# Supplementary material
Source: publisher site journal article supplement (https://www.dovepress.com/article/325710)
Supplement: Supplementary file 1 [file get_supplementary_file.php]

**Table S1. Pyroptosis-related genes identified from prior reviews**

| <b>The identified 33 genes</b>                                                                                                                                                                                                |
|-------------------------------------------------------------------------------------------------------------------------------------------------------------------------------------------------------------------------------|
| AIM2, CASP1, CASP3, CASP4, CASP5, CASP6, CASP8, CASP9, ELANE, GPX4, GSDMA, GSDMB, GSDMC, GSDMD, GSDME, IL18, IL1B, IL6, NLRC4, NLRP1, NLRP2, NLRP3, NLRP6, NLRP7, NOD1, NOD2, PJKV, PLCG1, PRKACA, PYCARD, SCAF11, TIRAP, TNF |

**Table S2. The identified pyroptosis-related lncRNAs**

| <b>The identified 356 lncRNAs</b>                                                                                                                                                                                                                                                                                                                                                                                                                                                                                                                                                                                                                                                                                                                                                                                                                                                                                                                                                                                                                                                                                                                                                                                                                                                                                                                                                                                                                                                                                                                                                                                                                                                                                                                                                                                                                                                                                                                                                                                                                                                                                                                                                                                                                                                                                                                                                                                                                                                                                                                                                                                                                                                                                                                                                                                                                                                                                                                                                                                                                              |
|----------------------------------------------------------------------------------------------------------------------------------------------------------------------------------------------------------------------------------------------------------------------------------------------------------------------------------------------------------------------------------------------------------------------------------------------------------------------------------------------------------------------------------------------------------------------------------------------------------------------------------------------------------------------------------------------------------------------------------------------------------------------------------------------------------------------------------------------------------------------------------------------------------------------------------------------------------------------------------------------------------------------------------------------------------------------------------------------------------------------------------------------------------------------------------------------------------------------------------------------------------------------------------------------------------------------------------------------------------------------------------------------------------------------------------------------------------------------------------------------------------------------------------------------------------------------------------------------------------------------------------------------------------------------------------------------------------------------------------------------------------------------------------------------------------------------------------------------------------------------------------------------------------------------------------------------------------------------------------------------------------------------------------------------------------------------------------------------------------------------------------------------------------------------------------------------------------------------------------------------------------------------------------------------------------------------------------------------------------------------------------------------------------------------------------------------------------------------------------------------------------------------------------------------------------------------------------------------------------------------------------------------------------------------------------------------------------------------------------------------------------------------------------------------------------------------------------------------------------------------------------------------------------------------------------------------------------------------------------------------------------------------------------------------------------------|
| HCP5, MINCR, AC011476.3, AL596325.2, AP006284.1, SMIM25, ZNF710-AS1, AC010883.1, AL158212.3, AC093278.2, CARD8-AS1, AC121761.2, AL450263.1, MIR200CHG, AC096586.2, AC093151.2, AC020765.2, AC018752.1, AC005899.6, LINC00685, AC003102.1, AC253536.3, AC087491.1, NPTN-IT1, AL021707.8, MIR100HG, AP000695.1 AC124312.5, LINC01137, AL049869.3, AC004982.1, AC109460.2, TNRC6C-AS1, AL513327.1, AC132872.1, OIP5-AS1, AC012170.2, AC084125.4, AC027307.2, AC018926.3, MAGI2-AS3, AL139289.1, ALG13-AS1, AP006621.2, AC010201.2, AC022400.5, ZNF32-AS1, LINC01578, AC103706.1, AC092119.2, USP46-AS1, AC006435.2, AL049840.5, AL022328.1, AL133371.2, NDUFV2-AS1, AC087500.1, BX537318.1, AC103691.1, AL513327.3, Z83843.1, AC024361.1, MIR155HG, LINC01871, AC243960.1, RAP2C-AS1, AC004492.1, AC011481.1, AC010834.3, AC015871.3, AC027097.2, RUSC1-AS1, RAD51-AS1, AL365330.1, U73166.1, PCED1B-AS1, RFX3-AS1, AC002553.1, AL513477.2, AC011477.2, ZKSCAN2-DT, AC133552.5, AC107464.3, AC024060.1, SNHG25, AC008115.3, AL121832.2, AC087286.2 AC004918.3, LINC00174, AC003070.1, FMR1-IT1, AC107027.3, LENG8-AS1, AC008608.2, AC004253.1, AC144450.1, LINC01011, AC234775.3, AC008610.1, AC137932.1, AC009065.4, LINC01089, AC084824.4, LINC00926, AC098613.1, AL390719.2, SNHG26, AC092171.4, AL158163.1, AC010761.3, AL021707.6, AL109811.3, GS1-124K5.4, AC090246.1, AC073896.4, AC015911.3, AL451165.2, LINC02446, AL138724.1, AC005104.1, PAXIP1-AS2, MIAT, AC093726.2, AC009318.3, WEE2-AS1, Z68871.1, RAB11B-AS1, AC108449.2, AC006213.5, AC114763.1, AL049840.2, AC004687.1, AC093673.1, ZNF32-AS2, LINC01857, AC022706.1, AC068152.1, AC040169.1, ANKRD10-IT1, AC024075.2, AC048341.2, AC011462.4, AC090559.1, AC024075.3, AC009120.2, SNHG7, AP005899.1, AC018638.7, AL139287.1, AC008906.1, AC090589.3, AC018755.4, AC026979.2, AC090948.3, AL121820.2, AC002091.1, AC087741.1, AC025287.3, EBLN3P, AC009119.1, AL390728.6, AL049840.1, AC127024.4, LINC01023, AC138028.4, AC008280.3, AC022306.2, AC073335.2, AC100830.2, MCCC1-AS1, AC084018.1, TP53TG1, AC027682.6, AC008760.1, AC008105.3, AC010503.4, MCM3AP-AS1, AL928654.2, AC135050.6, AL022328.2, CH17-340M24.3, AC005785.1, ZNF213-AS1, AC034236.2, AP000692.1, AC108062.1, C1RL-AS1, LINC00893, AL512791.1, LINC01355, AC005034.5, LINC00052, AC026471.4, AC009283.1, AC005034.3, AL157838.1, AC025171.4, AC062017.1, LINC01094, AC095057.3, AC067852.2, AC040977.1, AC018809.1, AC092279.1, AC139530.1, AC020663.2, AL139407.1, AC012510.1, AL590560.1, AC007878.1, SNHG9, AC007383.2, AC007406.5, PCBP1-AS1, HCG18, AC004148.2, AC091271.1, AC108134.4, LINC01176, AC008915.2, AL353804.1, AL139011.1, AP000254.1, AC097376.2, NALT1, NORAD, AC006942.1, AC004908.1, AC244197.2, AL035563.1, AC008870.2, AC008764.2, AL139246.5, YTHDF3-AS1, AP001318.2, MIR3142HG, AC138207.5, AL021707.3, AL731571.1, USP30-AS1, AC139100.2, AL354733.3, PSMA3-AS1, LY6E-DT, AC018653.3, DICER1-AS1, AC093382.1, NIFK-AS1, AL109614.1, AC023509.4, AL356356.1, AP002907.1, AC084824.5, AC098484.1, |

TMEM161B-AS1, AC021078.1, AC108673.3, AC007566.1, SPINT1-AS1, BACE1-AS, AL451085.2, AL122035.1, AL365361.1, AL450384.2, XIST, MIR22HG , AC104667.2, AP006621.3, ARRDC1-AS1, CKMT2-AS1, AC129510.1, AL136295.7, AL159169.2, AL162586.1, ALOX12-AS1, AC116366.1, AC020913.3, AC116914.2, CR936218.1, AL391244.1, AC138696.2, AL359715.1, AC087481.3, AC138956.2, AC083967.1, AC016876.1, AC004585, AL355488.1, STAG3L5P-PVRIG2P-PILRB, AL354696.1, AP003419.3, MIR3936HG, PXN-AS1, AC008770.3, HLA-DQB1-AS1, AL031670.1, Z97653.1, INE1, RPARP-AS1, AL135999.1, AC138393.3, AGBL5-IT1, KMT2E-AS1, ITGB2-AS1, AL162724.2, AL355075.2, AC010186.3, FTX, AL078581.1, AC127024.5, AL390760.1, AC007038.2, AC145098.1, AC135050.3, LINC01786, AC120053.1, GEMIN7-AS1, CCDC18-AS1 , AC069281.2, AC132192.2, AC015849.3, AC015922.2, TAPT1-AS1, SH3BP5-AS1, AC024075.1, AC147651.3, AC011477.3, AL353622.1, ERVK13-1, AL157392.3, AC006042.1, AC009318.4, AC122129.1, AL031709.1, AC004982.2, C5orf56, Z84485.1, AP000766.1, AL590764.1, AC093726.1, LINC01480, AL122125.1, ZSCAN16-AS1, AC245884.8, AC022150.4, LINC01004, PTOV1-AS2, AC027575.2, AP003392.1, AC074212.1, GARS-DT, PSMB8-AS1, AL132989.1, AC025917.1, ZNF460-AS1
